# Supplementary material for: SARS-CoV-2 ORF8 and SARS-CoV ORF8ab: Genomic Divergence and Functional Convergence
Source: Preprints.org preprint supplement (doi:10.20944/preprints202007.0587.v1), 2020-07-24
Supplement: Supplementary file 1 [file supplementary]

|          |                                                     |                               |     |     |                  |            |
|----------|-----------------------------------------------------|-------------------------------|-----|-----|------------------|------------|
|          | 1                                                   | 10                            | 20  | 30  | 40               | 50         |
| AY278489 | ATGAAACTTCTCATTTGTTTTGACTTGTATTTCTCTATGCAGTTGCATACG |                               |     |     |                  |            |
| AY283798 | ATGAAACTTCTCATTTGTTTTGACTTGTATTTCTCTATGCAGTTGCATATG |                               |     |     |                  |            |
|          | 60                                                  | 70                            | 80  | 90  | 100              |            |
| AY278489 | CACTGTAGTACAGCGCTGTGCATCTAATAAACCTCATGTGCTTGAAGATC  |                               |     |     |                  |            |
| AY283798 | CACTGTAGTACAGCGCTGTGCATCTAATAAACCTCATGTGCTTGAAGATC  |                               |     |     |                  |            |
|          | 110                                                 | 120                           | 130 | 140 | 150              |            |
| AY278489 | CTTGT                                               | CCTACTGGTTACCAACCTGAATGGAATAT |     |     | AAGGTACAACACTAGG |            |
| AY283798 | CTTGT                                               | .....                         |     |     | AAGGTACAACACTAGG |            |
|          | 160                                                 | 170                           | 180 | 190 | 200              |            |
| AY278489 | GGTAATACTTATAGCACTGCTTGGCTTTGTGCTCTAGGAAAGGTTTTACC  |                               |     |     |                  |            |
| AY283798 | GGTAATACTTATAGCACTGCTTGGCTTTGTGCTCTAGGAAAGGTTTTACC  |                               |     |     |                  |            |
|          | 210                                                 | 220                           | 230 | 240 | 250              |            |
| AY278489 | TTTTCATAGATGGCACACTATGGTTCAAACATGCACACCTAATGTTACTA  |                               |     |     |                  |            |
| AY283798 | TTTTCATAGATGGCACACTATGGTTCAAACATGCACACCTAATGTTACTA  |                               |     |     |                  |            |
|          | 260                                                 | 270                           | 280 | 290 | 300              |            |
| AY278489 | TCAACTGTCAAGATCCAGCTGGTGGTGCGCTTATAGCTAGGTGTTGGTAC  |                               |     |     |                  |            |
| AY283798 | TCAACTGTCAAGATCCAGCTGGTGGTGCGCTTATAGCTAGGTGTTGGTAC  |                               |     |     |                  |            |
|          | 310                                                 | 320                           | 330 | 340 | 350              |            |
| AY278489 | CTTCATGAAGGTCACCAAACCTGCTGCATTTAGAGACGTA            |                               |     |     | T                | TTGTTGTTTT |
| AY283798 | CTTCATGAAGGTCACCAAACCTGCTGCATTTAGAGACGTA            |                               |     |     | C                | TTGTTGTTTT |
|          | 360                                                 |                               |     |     |                  |            |
| AY278489 | AAATAAACGAACAAATTAA                                 |                               |     |     |                  |            |
| AY283798 | AAATAAACGAACAAATTAA                                 |                               |     |     |                  |            |
