# Supplementary material for: SARS-CoV-2 ORF8 and SARS-CoV ORF8ab: Genomic Divergence and Functional Convergence
Source: Preprints.org preprint supplement (doi:10.20944/preprints202007.0587.v1), 2020-07-24
Supplement: Supplementary file 2 [file supplementary]

**S2.** Details of the sequences in NCBI Dataset. Information has been retrieved from [https://www.ncbi.nlm.nih.gov/labs/virus/vssi/#/virus?SeqType\\_s=Nucleotide&VirusLineage\\_ss=Wuhan%20seafood%20market%20pneumonia%20virus,%20taxid:2697049](https://www.ncbi.nlm.nih.gov/labs/virus/vssi/#/virus?SeqType_s=Nucleotide&VirusLineage_ss=Wuhan%20seafood%20market%20pneumonia%20virus,%20taxid:2697049)

| Accession | Geo_Location                   | Collection_Date |
|-----------|--------------------------------|-----------------|
| MN908947  | China                          | 2019-12         |
| NC_045512 | China                          | 2019-12         |
| MT291829  | China: Wuhan                   | 12/30/2019      |
| MT186683  | Hong Kong                      | 2020-01         |
| MT270104  | Germany: Bavaria               | 2020-01         |
| MT019533  | China: Hubei, Wuhan            | 1/1/2020        |
| MN988669  | China                          | 1/2/2020        |
| MT093631  | China                          | 1/8/2020        |
| MN938384  | China: Shenzhen                | 1/10/2020       |
| MT072688  | Nepal                          | 1/13/2020       |
| MT192773  | Viet Nam: Ho Chi Minh city     | 1/22/2020       |
| MT039874  | China                          | 1/22/2020       |
| MT007544  | Australia: Melbourne, Victoria | 1/25/2020       |
| MT020880  | USA: WA                        | 1/25/2020       |
| MT192759  | Taiwan                         | 1/25/2020       |
| MT407653  | China: Zhejiang                | 1/26/2020       |
| MT044258  | USA: CA                        | 1/27/2020       |
| MT012098  | India: Kerala State            | 1/27/2020       |
| MT114415  | Hong Kong                      | 1/27/2020       |
| MT135042  | China: Beijing                 | 1/28/2020       |
| MT020781  | Finland                        | 1/29/2020       |
| MT039888  | USA: MA                        | 1/29/2020       |
| MT066156  | Italy                          | 1/30/2020       |
| MT066175  | Taiwan                         | 1/31/2020       |
| MT077125  | Italy                          | 1/31/2020       |
| MT121215  | China: Shanghai                | 2/2/2020        |
| MT374101  | Taiwan                         | 2/4/2020        |
| MT446312  | China: Guangdong, Guangzhou    | 2/5/2020        |
| MT093571  | Sweden                         | 2/7/2020        |
| MT106054  | USA: TX                        | 2/11/2020       |
| MT152824  | USA: Snohomish County, WA      | 2/24/2020       |
| MT159716  | USA                            | 2/24/2020       |
| MT412134  | China                          | 2/24/2020       |
| MT233519  | Spain: Valencia                | 2/27/2020       |
| MT304474  | South Korea                    | 2/27/2020       |
| MT370518  | Taiwan                         | 2/27/2020       |
| MT126808  | Brazil                         | 2/28/2020       |

|          |                       |           |
|----------|-----------------------|-----------|
| MT582499 | Germany: Heinsberg    | 2/28/2020 |
| MT304475 | South Korea           | 2/29/2020 |
| MT320538 | France                | 2020-03   |
| MT322394 | USA: VA               | 2020-03   |
| MT163720 | USA: WA               | 3/1/2020  |
| MT325565 | USA: FL               | 3/2/2020  |
| MT240479 | Pakistan: Gilgit      | 3/4/2020  |
| MT370842 | USA: NY               | 3/4/2020  |
| MT188339 | USA: MN               | 3/9/2020  |
| MT292571 | Spain                 | 3/9/2020  |
| MT320891 | Iran                  | 3/9/2020  |
| MT510999 | Netherlands: Leiden   | 3/9/2020  |
| MT371048 | Sri Lanka             | 3/10/2020 |
| MT252680 | USA: WA               | 3/10/2020 |
| MT252683 | USA: WA               | 3/10/2020 |
| MT512416 | USA                   | 3/10/2020 |
| MT678839 | South Korea           | 3/11/2020 |
| MT246451 | USA: WA               | 3/13/2020 |
| MT246461 | USA: WA               | 3/13/2020 |
| MT246482 | USA: WA               | 3/15/2020 |
| MT359865 | Spain                 | 3/15/2020 |
| MT507281 | USA                   | 3/15/2020 |
| MT510718 | USA                   | 3/15/2020 |
| MT500122 | Pakistan: Karachi     | 3/16/2020 |
| MT507794 | Jamaica               | 3/16/2020 |
| MT670018 | Chile                 | 3/17/2020 |
| MT679198 | USA: NY               | 3/17/2020 |
| MT350282 | Brazil                | 3/18/2020 |
| MT371049 | Sri Lanka             | 3/19/2020 |
| MT371569 | Czech Republic        | 3/19/2020 |
| MT372482 | Malaysia              | 3/20/2020 |
| MT479226 | Taiwan                | 3/20/2020 |
| MT371570 | Czech Republic        | 3/21/2020 |
| MT520360 | USA: Massachusetts    | 3/22/2020 |
| MT635445 | Russia: Moscow region | 3/22/2020 |
| MT637143 | Russia: Moscow region | 3/22/2020 |
| MT451195 | Australia: Victoria   | 3/23/2020 |
| MT451207 | Australia: Victoria   | 3/24/2020 |
| MT559038 | Tunisia: Ben Arous    | 3/24/2020 |
| MT375429 | USA: ID               | 3/29/2020 |
| MT293156 | USA: WA               | 3/30/2020 |
| MT415904 | USA: VA               | 2020-04   |
| MT511067 | Poland                | 4/2/2020  |

|          |                       |           |
|----------|-----------------------|-----------|
| MT461646 | USA: WA               | 4/3/2020  |
| MT358637 | India: Rajkot         | 4/5/2020  |
| MT358401 | USA: New Orleans, LA  | 4/6/2020  |
| MT641731 | Australia: Victoria   | 4/8/2020  |
| MT675958 | Turkey                | 4/8/2020  |
| MT499210 | Poland                | 4/11/2020 |
| MT435079 | India: Ahmedabad      | 4/13/2020 |
| MT641759 | Australia: Victoria   | 4/14/2020 |
| MT641776 | Timor-Leste           | 4/14/2020 |
| MT605818 | Turkey                | 4/16/2020 |
| MT435086 | India: Mansa          | 4/21/2020 |
| MT435085 | India: Gandhinagar    | 4/22/2020 |
| MT438739 | USA: CA               | 4/22/2020 |
| MT396266 | Netherlands: Milheeze | 4/24/2020 |
| MT451881 | India: Ahmedabad      | 4/26/2020 |
| MT577627 | USA: FL               | 4/28/2020 |
| MT510690 | Egypt                 | 5/2/2020  |
| MT496992 | India: Ahmedabad      | 5/3/2020  |
| MT502774 | Bangladesh            | 5/13/2020 |
| MT539159 | Bangladesh            | 5/21/2020 |
| MT601286 | Bangladesh: Dhaka     | 6/1/2020  |
| MT614597 | Egypt                 | 6/2/2020  |
| MT635672 | Bangladesh            | 6/7/2020  |
| MT039890 | South Korea           | 2020-01   |
