# Supplementary material for: SARS-CoV-2 ORF8 and SARS-CoV ORF8ab: Genomic Divergence and Functional Convergence
Source: Preprints.org preprint supplement (doi:10.20944/preprints202007.0587.v1), 2020-07-24
Supplement: Supplementary file 3 [file supplementary]

**S3.** Details of the sequences in GISAID Dataset. Information has been retrieved from <https://www.epicov.org/epi3/frontend#48b3ad>

| Accession ID                   | Virus name                                 | Location                                            | Collection date |
|--------------------------------|--------------------------------------------|-----------------------------------------------------|-----------------|
| EPI_ISL_402123                 | hCoV-19/Wuhan/IPBCAMS-WH-01/2019           | Asia / China / Hubei / Wuhan                        | 2019-12-24      |
| EPI_ISL_402127                 | hCoV-19/Wuhan/WIV02/2019                   | Asia / China / Hubei / Wuhan                        | 2019-12-30      |
| EPI_ISL_402129                 | hCoV-19/Wuhan/WIV06/2019                   | Asia / China / Hubei / Wuhan                        | 2019-12-30      |
| EPI_ISL_403932                 | hCoV-19/Guangdong/20SF012/2020             | Asia / China / Guangdong / Shenzhen                 | 2020-01-14      |
| EPI_ISL_406534                 | hCoV-19/Foshan/20SF207/2020                | Asia / China / Guangdong / Foshan                   | 2020-01-22      |
| EPI_ISL_428469                 | hCoV-19/Guangdong/20SF665/2020             | Asia / China / Guangdong / Zhongshan                | 2020-01-27      |
| EPI_ISL_428444                 | hCoV-19/Guangdong/20SF1152/2020            | Asia / China / Guangdong / Huizhou                  | 2020-01-30      |
| EPI_ISL_416342                 | hCoV-19/Shanghai/SH0033/2020               | Asia / China / Shanghai                             | 2020-02-04      |
| EPI_ISL_431782                 | hCoV-19/Fujian/IM3520014T/2020             | Asia / China / Fujian                               | 2020-03-22      |
| EPI_ISL_406973                 | hCoV-19/Singapore/1/2020                   | Asia / Singapore                                    | 2020-01-23      |
| EPI_ISL_418996                 | hCoV-19/Singapore/15/2020                  | Asia / Singapore                                    | 2020-01-27      |
| EPI_ISL_419001                 | hCoV-19/Singapore/19/2020                  | Asia / Singapore                                    | 2020-03-02      |
| EPI_ISL_435695                 | hCoV-19/Singapore/90/2020                  | Asia / Singapore                                    | 2020-04-23      |
| EPI_ISL_420555                 | hCoV-19/India/c32/2020                     | Asia / India                                        | 2020-03-03      |
| EPI_ISL_435106                 | hCoV-19/India/NCDC-01760/2020              | Asia / India / Ladakh                               | 2020-03-18      |
| EPI_ISL_436453                 | hCoV-19/India/NCDC-4444/2020               | Asia / India / Madhya Pradesh                       | 2020-04-16      |
| EPI_ISL_437442                 | hCoV-19/India/GBRC14/2020                  | Asia / India / Gujarat / Surat                      | 2020-04-27      |
| EPI_ISL_416432                 | hCoV-19/Saudi Arabia/KAIMRC-Alghoribi/2020 | Asia / Saudi Arabia / Riyadh                        | 2020-03-07      |
| EPI_ISL_416521                 | hCoV-19/Saudi Arabia/SCDC-3321/2020        | Asia / Saudi Arabia                                 | 2020-03-10      |
| EPI_ISL_437459                 | hCoV-19/Saudi Arabia/KAUST-MAKKAH03/2020   | Asia / Saudi Arabia / Makkah                        | 2020-03-23      |
| EPI_ISL_437469                 | hCoV-19/Saudi Arabia/KAUST-MADINAH25/2020  | Asia / Saudi Arabia / Madinah                       | 2020-03-29      |
| EPI_ISL_437475                 | hCoV-19/Saudi Arabia/KAUST-JEDDAH64/2020   | Asia / Saudi Arabia / Jeddah                        | 2020-04-01      |
| EPI_ISL_435281                 | hCoV-19/Indonesia/JKT-EIJK0141/2020        | Asia / Indonesia / Jakarta                          | 2020-03-17      |
| EPI_ISL_437188                 | hCoV-19/Indonesia/EJ-ITD3590NT/2020        | Asia / Indonesia / Surabaya                         | 2020-04-14      |
| EPI_ISL_417920                 | hCoV-19/Malaysia/190300/2020               | Asia / Malaysia / Kuala Lumpur                      | 2020-03-22      |
| EPI_ISL_430439                 | hCoV-19/Malaysia/IMR_WC1177/2020           | Asia / Malaysia                                     | 2020-03-05      |
| EPI_ISL_413515                 | hCoV-19/South Korea/KUMC05/2020            | Asia / South Korea                                  | 2020-02-27      |
| EPI_ISL_425118                 | hCoV-19/Korea/KCDC2002/2020                | Asia / South Korea                                  | 2020-01-30      |
| EPI_ISL_427812                 | hCoV-19/Korea/KCDC2018/2020                | Asia / South Korea                                  | 2020-02-19      |
| EPI_ISL_404895                 | hCoV-19/USA/WA1/2020                       | North America / USA / Washington / Snohomish County | 2020-01-19      |
| EPI_ISL_413014                 | hCoV-19/Canada/ON-PHL2445/2020             | North America / Canada / Ontario                    | 2020-01-25      |
| <a href="#">EPI_ISL_410044</a> | hCoV-19/USA/CA6/2020                       | North America / USA / California                    | 2020-01-27      |
| EPI_ISL_410045                 | hCoV-19/USA/IL2/2020                       | North America / USA / Illinois                      | 2020-01-28      |

|                |                                     |                                                                |            |
|----------------|-------------------------------------|----------------------------------------------------------------|------------|
| EPI_ISL_409067 | hCoV-19/USA/MA1/2020                | North America / USA / Massachusetts                            | 2020-01-29 |
| EPI_ISL_413613 | hCoV-19/USA/CruiseA-8/2020          | North America / USA                                            | 2020-02-17 |
| EPI_ISL_412972 | hCoV-19/Mexico/CDMX-InDRE_01/2020   | North America / Mexico / Mexico City                           | 2020-02-27 |
| EPI_ISL_415581 | hCoV-19/Canada/BC_02421/2020        | North America / Canada / British Columbia                      | 2020-03-01 |
| EPI_ISL_420797 | hCoV-19/USA/TX_2817/2020            | North America / USA / Texas                                    | 2020-03-01 |
| EPI_ISL_436050 | hCoV-19/USA/NY-SURV0144/2020        | North America / USA / New York / New York City                 | 2020-03-02 |
| EPI_ISL_418330 | hCoV-19/Canada/ON_PHL8580/2020      | North America / Canada / Ontario                               | 2020-03-05 |
| EPI_ISL_419261 | hCoV-19/USA/VA-DCLS-0009/2020       | North America / USA / Virginia                                 | 2020-03-09 |
| EPI_ISL_424868 | hCoV-19/USA/LA_0842/2020            | North America / USA / Louisiana                                | 2020-03-09 |
| EPI_ISL_436052 | hCoV-19/USA/NY-SURV0165/2020        | North America / USA / New York / New York City                 | 2020-03-09 |
| EPI_ISL_414648 | hCoV-19/USA/CA-PC101P/2020          | North America / USA / California / San Diego County            | 2020-03-11 |
| EPI_ISL_417192 | hCoV-19/USA/MN25-MDH25/2020         | North America / USA / Minnesota                                | 2020-03-12 |
| EPI_ISL_426365 | hCoV-19/Mexico/CDMX-INCMNSZ_05/2020 | North America / Mexico / Mexico City                           | 2020-03-12 |
| EPI_ISL_427530 | hCoV-19/USA/NY-WCMP3E02P/2020       | North America / USA / New York / Manhattan                     | 2020-03-12 |
| EPI_ISL_417027 | hCoV-19/USA/UT-09/2020              | North America / USA / Utah                                     | 2020-03-20 |
| EPI_ISL_418350 | hCoV-19/Canada/ON_PHL3380/2020      | North America / Canada / Ontario                               | 2020-03-20 |
| EPI_ISL_428316 | hCoV-19/USA/WI-220/2020             | North America / USA / Wisconsin / Mequon                       | 2020-03-25 |
| EPI_ISL_427162 | hCoV-19/USA/CT-UW-4238/2020         | North America / USA / Connecticut                              | 2020-03-30 |
| EPI_ISL_428757 | hCoV-19/USA/NY-NYUMC243/2020        | North America / USA / New York / Brooklyn                      | 2020-03-30 |
| EPI_ISL_430940 | hCoV-19/USA/ID-UW-4255/2020         | North America / USA / Idaho                                    | 2020-03-30 |
| EPI_ISL_435444 | hCoV-19/USA/AK-PHL193/2020          | North America / USA / Alaska / Wasilla                         | 2020-04-09 |
| EPI_ISL_435517 | hCoV-19/USA/NY-NYUMC450/2020        | North America / USA / New York / Nassau County                 | 2020-04-20 |
| EPI_ISL_435474 | hCoV-19/USA/CA-SR0176/2020          | North America / USA / California / San Diego                   | 2020-04-29 |
| EPI_ISL_412116 | hCoV-19/England/09c/2020            | Europe / United Kingdom / England                              | 2020-02-09 |
| EPI_ISL_412973 | hCoV-19/Italy/CDG1/2020             | Europe / Italy / Lombardy                                      | 2020-02-20 |
| EPI_ISL_413996 | hCoV-19/Switzerland/TI9486/2020     | Europe / Switzerland / Tessin                                  | 2020-02-24 |
| EPI_ISL_414497 | hCoV-19/Germany/NRW-02-1/2020       | Europe / Germany / North Rhine Westphalia / Heinsberg District | 2020-02-25 |
| EPI_ISL_414623 | hCoV-19/France/GE1583/2020          | Europe / France / Grand-Est / Strasbourg                       | 2020-02-25 |
| EPI_ISL_418251 | hCoV-19/Spain/Madrid201105/2020     | Europe / Spain / Madrid                                        | 2020-02-25 |
| EPI_ISL_416142 | hCoV-19/Denmark/SSI-01/2020         | Europe / Denmark / Copenhagen                                  | 2020-02-26 |
| EPI_ISL_417484 | hCoV-19/Norway/1380/2020            | Europe / Norway / Oslo                                         | 2020-02-26 |
| EPI_ISL_419655 | hCoV-19/Austria/CeMM0002/2020       | Europe / Austria / Vienna                                      | 2020-02-26 |
| EPI_ISL_413555 | hCoV-19/Wales/PHW1/2020             | Europe / United Kingdom / Wales                                | 2020-02-27 |
| EPI_ISL_425551 | hCoV-19/England/NOTT-10E49C/2020    | Europe / United Kingdom / England                              | 2020-03-22 |

|                |                                           |                                                     |            |
|----------------|-------------------------------------------|-----------------------------------------------------|------------|
| EPI_ISL_432348 | hCoV-19/Wales/PHWC-25339/2020             | Europe / United Kingdom / Wales                     | 2020-03-23 |
| EPI_ISL_425893 | hCoV-19/Scotland/EDB103/2020              | Europe / United Kingdom / Scotland                  | 2020-03-22 |
| EPI_ISL_433866 | hCoV-19/England/CAMB-7ACFE/2020           | Europe / United Kingdom / England                   | 2020-04-08 |
| EPI_ISL_433426 | hCoV-19/Scotland/EDB1182/2020             | Europe / United Kingdom / Scotland                  | 2020-04-08 |
| EPI_ISL_433481 | hCoV-19/England/CAMB-7FB56/2020           | Europe / United Kingdom / England                   | 2020-04-17 |
| EPI_ISL_417922 | hCoV-19/Italy/INMI4/2020                  | Europe / Italy / Rome                               | 2020-02-28 |
| EPI_ISL_418256 | hCoV-19/Italy/TE4880/2020                 | Europe / Italy / Abruzzo                            | 2020-03-14 |
| EPI_ISL_435147 | hCoV-19/Italy/TE12759/2020                | Europe / Italy / Abruzzo                            | 2020-04-08 |
| EPI_ISL_406862 | hCoV-19/Germany/BavPat1/2020              | Europe / Germany / Bavaria / Munich                 | 2020-01-28 |
| EPI_ISL_419534 | hCoV-19/Germany/NRW-17/2020               | Europe / Germany / Duesseldorf                      | 2020-03-11 |
| EPI_ISL_437237 | hCoV-19/Germany/BAV-MVP0038/2020          | Europe / Germany / Bavaria / Munich                 | 2020-03-23 |
| EPI_ISL_437297 | hCoV-19/Germany/BAV-MVP0107/2020          | Europe / Germany / Bavaria / Munich                 | 2020-04-13 |
| EPI_ISL_406596 | hCoV-19/France/IDF0372/2020               | Europe / France / Ile-de-France / Paris             | 2020-01-23 |
| EPI_ISL_429968 | hCoV-19/France/HF1463/2020                | Europe / France / Hauts de France / Compiègne       | 2020-02-21 |
| EPI_ISL_416495 | hCoV-19/France/HF2234/2020                | Europe / France / Hauts de France / Compiègne       | 2020-03-10 |
| EPI_ISL_419170 | hCoV-19/France/ARA11943/2020              | Europe / France / ARA / Lyon                        | 2020-03-21 |
| EPI_ISL_428366 | hCoV-19/France/HF4220/2020                | Europe / France / Hauts De France / Chateau-thierry | 2020-03-30 |
| EPI_ISL_434633 | hCoV-19/France/OCC-18/2020                | Europe / France / Occitanie                         | 2020-04-09 |
| EPI_ISL_419677 | hCoV-19/Spain/Valencia13/2020             | Europe / Spain / Comunitat Valenciana / Valencia    | 2020-03-09 |
| EPI_ISL_425218 | hCoV-19/Spain/Valencia94/2020             | Europe / Spain / Comunitat Valenciana / Valencia    | 2020-03-17 |
| EPI_ISL_428700 | hCoV-19/Spain/Madrid_H12_2501/2020        | Europe / Spain / Madrid                             | 2020-03-27 |
| EPI_ISL_419562 | hCoV-19/Luxembourg/LNS0000001/2020        | Europe / Luxembourg                                 | 2020-02-29 |
| EPI_ISL_430469 | hCoV-19/Greece/127_HPI/2020               | Europe / Greece / Athens                            | 2020-02-29 |
| EPI_ISL_413588 | hCoV-19/Netherlands/Utrecht_1363564/2020  | Europe / Netherlands / Utrecht                      | 2020-03-01 |
| EPI_ISL_415154 | hCoV-19/Belgium/BM-03012/2020             | Europe / Belgium / Kraainem                         | 2020-03-01 |
| EPI_ISL_417736 | hCoV-19/Iceland/14/2020                   | Europe / Iceland / Reykjavik                        | 2020-03-01 |
| EPI_ISL_421487 | hCoV-19/Portugal/PT0084/2020              | Europe / Portugal                                   | 2020-03-22 |
| EPI_ISL_434670 | hCoV-19/Sweden/20-07439/2020              | Europe / Sweden / Vstra Gotaland                    | 2020-04-17 |
| EPI_ISL_416741 | hCoV-19/Lithuania/ChVir1632/2020          | Europe / Lithuania / Vilnius                        | 2020-02    |
| EPI_ISL_415710 | hCoV-19/Russia/StPetersburg-3524/2020     | Europe / Russia / Saint Petersburg                  | 2020-03-15 |
| EPI_ISL_420080 | hCoV-19/Russia/StPetersburg-RII3992/2020  | Europe / Russia / Saint Petersburg                  | 2020-03-18 |
| EPI_ISL_427310 | hCoV-19/Russia/StPetersburg-RII4382V/2020 | Europe / Russia / Saint-Petersburg                  | 2020-03-29 |
| EPI_ISL_430086 | hCoV-19/Russia/StPetersburg-RII5033S/2020 | Europe / Russia / St.Petersburg                     | 2020-04-10 |

|                |                                           |                                                             |            |
|----------------|-------------------------------------------|-------------------------------------------------------------|------------|
| EPI_ISL_430110 | hCoV-19/Russia/StPetersburg-RII6065S/2020 | Europe / Russia / St.Petersburg                             | 2020-04-15 |
| EPI_ISL_430112 | hCoV-19/Russia/Ulan-Ude-RII4562V/2020     | Europe / Russia / Buryat Republic / Ulan-Ude                | 2020-03-25 |
| EPI_ISL_408976 | hCoV-19/Australia/NSW02/2020              | Oceania / Australia / New South Wales / Sydney              | 2020-01-22 |
| EPI_ISL_416519 | hCoV-19/New Zealand/20VR0189/2020         | Oceania / New Zealand / Auckland                            | 2020-03-02 |
| EPI_ISL_416539 | hCoV-19/New Zealand/20VR0276/2020         | Oceania / New Zealand / Wellington                          | 2020-03-15 |
| EPI_ISL_419796 | hCoV-19/Australia/VIC86/2020              | Oceania / Australia / Victoria                              | 2020-03-15 |
| EPI_ISL_412964 | hCoV-19/Brazil/SPBR-01/2020               | South America / Brazil / Sao Paulo / Sao Paulo              | 2020-02-25 |
| EPI_ISL_415661 | hCoV-19/Chile/Santiago_op4d1/2020         | South America / Chile / Santiago                            | 2020-03-08 |
| EPI_ISL_415787 | hCoV-19/Peru/010/2020                     | South America / Peru / Lima                                 | 2020-03-10 |
| EPI_ISL_417924 | hCoV-19/Colombia/Antioquia79256/2020      | South America / Colombia / Antioquia                        | 2020-03-11 |
| EPI_ISL_430816 | hCoV-19/Argentina/PAIS_A025/2020          | South America / Argentina / Ciudad Autonoma de Buenos Aires | 2020-04-18 |
| EPI_ISL_418206 | hCoV-19/Senegal/003/2020                  | Africa / Senegal / Dakar                                    | 2020-02-28 |
| EPI_ISL_418241 | hCoV-19/Algeria/G0638_2264/2020           | Africa / Algeria / Boufarik                                 | 2020-03-02 |
| EPI_ISL_420852 | hCoV-19/DRC/396/2020                      | Africa / Democratic Republic of the Congo / Kinshasa        | 2020-03-26 |
| EPI_ISL_421573 | hCoV-19/South Africa/KRISP-06/2020        | Africa / South Africa / KZN                                 | 2020-03-31 |
| EPI_ISL_428857 | hCoV-19/Gambia/GC19-029/2020              | Africa / Gambia / West Coast Region                         | 2020-04-20 |
| EPI_ISL_430297 | hCoV-19/South Africa/R02827/2020          | Africa / South Africa / GP                                  | 2020-03-06 |
| EPI_ISL_456713 | hCoV-19/England/CAMB-1B2C08/2020          | Europe / United Kingdom / England                           | 2020-05-19 |
| EPI_ISL_457482 | hCoV-19/England/NORW-EBB64/2020           | Europe / United Kingdom / England                           | 2020-05-06 |
| EPI_ISL_458150 | hCoV-19/Morocco/15N/2020                  | Africa / North Africa / Morocco                             | 2020-05-15 |
| EPI_ISL_459893 | hCoV-19/Luxembourg/LNS0681882/2020        | Europe / Luxembourg                                         | 2020-05-15 |
| EPI_ISL_460888 | hCoV-19/Netherlands/Gelderland_127/2020   | Europe / Netherlands / Gelderland                           | 2020-05-22 |
| EPI_ISL_461759 | hCoV-19/Scotland/EDB5590/2020             | Europe / United Kingdom / Scotland                          | 2020-05-25 |
| EPI_ISL_463694 | hCoV-19/USA/WA-S1204/2020                 | North America / USA / Washington                            | 2020-05-06 |
| EPI_ISL_463696 | hCoV-19/USA/WA-S1206/2020                 | North America / USA / Washington                            | 2020-05-06 |
| EPI_ISL_466626 | hCoV-19/Bangladesh/BCSIR-NILMRC_051/2020  | Asia / Bangladesh                                           | 2020-05-07 |
| EPI_ISL_466909 | hCoV-19/Germany/BAV-MVP0283/2020          | Europe / Germany / Bavaria / Munich                         | 2020-05-11 |
| EPI_ISL_467190 | hCoV-19/Spain/COV003722/2020              | Europe / Spain                                              | 2020-05-07 |
| EPI_ISL_468465 | hCoV-19/USA/CA-CZB-1519/2020              | North America / USA / California                            | 2020-05-11 |
| EPI_ISL_469055 | hCoV-19/Sweden/20-14262/2020              | Europe / Sweden / Trangsund / Spelvagen                     | 2020-05-02 |
| EPI_ISL_469275 | hCoV-19/Egypt/CUNCI-HGC002-2/2020         | North Africa / Egypt                                        | 2020-05-02 |
| EPI_ISL_471702 | hCoV-19/USA/MI-MDHHS-SC20678/2020         | North America / USA / Michigan                              | 2020-05-14 |

|                |                                          |                                    |            |
|----------------|------------------------------------------|------------------------------------|------------|
| EPI_ISL_473127 | hCoV-19/Wales/PHWC-162830/2020           | Europe / United Kingdom / Wales    | 2020-05-31 |
| EPI_ISL_473676 | hCoV-19/Scotland/CVR3539/2020            | Europe / United Kingdom / Scotland | 2020-05-13 |
| EPI_ISL_473926 | hCoV-19/Scotland/EDB6244/2020            | Europe / United Kingdom / Scotland | 2020-05-21 |
| EPI_ISL_475754 | hCoV-19/Bangladesh/BCSIR-NILMRC_025/2020 | Asia / Bangladesh                  | 2020-05-24 |
| EPI_ISL_477001 | hCoV-19/Belgium/reg-0505428/2020         | Europe / Belgium / Rega            | 2020-05-05 |
| EPI_ISL_477004 | hCoV-19/Belgium/reg-0506487/2020         | Europe / Belgium / Rega            | 2020-05-06 |
| EPI_ISL_477169 | hCoV-19/Georgia/Tb-7851/2020             | Europe / Georgia / Tbilisi         | 2020-05-01 |
| EPI_ISL_478094 | hCoV-19/Scotland/CVR3690/2020            | Europe / United Kingdom / Scotland | 2020-05-24 |
| EPI_ISL_479519 | hCoV-19/India/NIV-22552/2020             | Asia / India                       | 2020-05-07 |
| EPI_ISL_480274 | hCoV-19/Turkey/GLAB-CoV187/2020          | Europe / Turkey / Istanbul         | 2020-05-07 |
| EPI_ISL_480305 | hCoV-19/Bulgaria/27/2020                 | Europe / Bulgaria                  | 2020-05-17 |
| EPI_ISL_480413 | hCoV-19/USA/WI-UW-431/2020               | North America / USA / Wisconsin    | 2020-05-01 |
| EPI_ISL_481907 | hCoV-19/England/BRIS-12D206/2020         | Europe / United Kingdom / England  | 2020-05-01 |
| EPI_ISL_482501 | hCoV-19/India/NCDC1722_CSIR-IGIB/2020    | Asia / India                       | 2020-05-17 |
| EPI_ISL_482669 | hCoV-19/India/NCDC7757_CSIR-IGIB/2020    | Asia / India                       | 2020-05-28 |
| EPI_ISL_483325 | hCoV-19/USA/CA-ALSR-0724-IPL/2020        | North America / USA / California   | 2020-05-04 |
| EPI_ISL_467053 | hCoV-19/India/GBRC183a/2020              | Asia / India                       | 2020-06-03 |
| EPI_ISL_469048 | hCoV-19/India/GBRC202/2020               | Asia / India                       | 2020-06-05 |
| EPI_ISL_472090 | hCoV-19/England/LIVE-A00F3/2020          | Europe / United Kingdom / England  | 2020-06-05 |
| EPI_ISL_472354 | hCoV-19/England/NORW-ED18E/2020          | Europe / United Kingdom / England  | 2020-06-01 |
| EPI_ISL_477762 | hCoV-19/England/BIRM-61331/2020          | Europe / United Kingdom / England  | 2020-06-13 |
| EPI_ISL_478392 | hCoV-19/England/LIVE-A0C2C/2020          | Europe / United Kingdom / England  | 2020-06-15 |
| EPI_ISL_479242 | hCoV-19/England/SHEF-CA71C/2020          | Europe / United Kingdom / England  | 2020-06-03 |
| EPI_ISL_479246 | hCoV-19/England/SHEF-CB168/2020          | Europe / United Kingdom / England  | 2020-06-16 |
| EPI_ISL_479560 | hCoV-19/India/NIV-64908/2020             | Asia / India                       | 2020-06-16 |
| EPI_ISL_480676 | hCoV-19/Australia/VIC1952/2020           | Oceania / Australia / Victoria     | 2020-06-09 |
| EPI_ISL_480704 | hCoV-19/Australia/VIC2093/2020           | Oceania / Australia / Victoria     | 2020-06-15 |
| EPI_ISL_481183 | hCoV-19/India/ILSCV34479/2020            | Asia / India                       | 2020-06-09 |
| EPI_ISL_481242 | hCoV-19/USA/MN-MDH-1224/2020             | North America / USA / Minnesota    | 2020-06-06 |
| EPI_ISL_482699 | hCoV-19/Singapore/552/2020               | Asia / Singapore                   | 2020-06-06 |
| EPI_ISL_482867 | hCoV-19/SouthAfrica/KRISP-0280/2020      | Africa / South Africa / KZN        | 2020-06-16 |
| EPI_ISL_483504 | hCoV-19/USA/CA-ALSR-1077-SAN/2020        | North America / USA / California   | 2020-06-22 |
| EPI_ISL_483619 | hCoV-19/Singapore/596/2020               | Asia / Singapore                   | 2020-06-22 |
| EPI_ISL_483687 | hCoV-19/Bangladesh/BCSIR-NILMRC_205/2020 | Asia / Bangladesh                  | 2020-06-26 |
| EPI_ISL_484672 | hCoV-19/Scotland/CVR3886/2020            | Europe / United Kingdom / Scotland | 2020-06-03 |
| EPI_ISL_484684 | hCoV-19/Scotland/EDB6609/2020            | Europe / United Kingdom / Scotland | 2020-06-22 |
| EPI_ISL_484689 | hCoV-19/Wales/PHWC-165615/2020           | Europe / United Kingdom / Wales    | 2020-06-28 |
| EPI_ISL_484939 | hCoV-19/USA/WI-UW-564/2020               | North America / USA / Wisconsin    | 2020-06-28 |
| EPI_ISL_484974 | hCoV-19/USA/WI-UW-599/2020               | North America / USA / Wisconsin    | 2020-06-28 |

|                |                                         |                                         |            |
|----------------|-----------------------------------------|-----------------------------------------|------------|
| EPI_ISL_486117 | hCoV-19/USA/CA-CZB-1783/2020            | North America / USA / California        | 2020-06-03 |
| EPI_ISL_486514 | hCoV-19/Switzerland/160021_450_B01/2020 | Europe / Switzerland                    | 2020-06-15 |
| EPI_ISL_486516 | hCoV-19/Switzerland/170001_454_D09/2020 | Europe / Switzerland                    | 2020-06-27 |
| EPI_ISL_486850 | hCoV-19/Ecuador/USFQ-118/2020           | South America / Ecuador / San Francisco | 2020-06-30 |
| EPI_ISL_487106 | hCoV-19/Nigeria/ON191-CV49/2020         | Africa / Nigeria                        | 2020-06-30 |
| EPI_ISL_487273 | hCoV-19/Bahrain/110003611/2020          | Asia / Bahrain                          | 2020-06-25 |
|                |                                         |                                         |            |
